# Supplementary material
Source: publisher figshare collection journal article supplement (https://gsapubs.figshare.com/ndownloader/files/22408851)
Supplement: Supplementary file 1 [file 22408851]

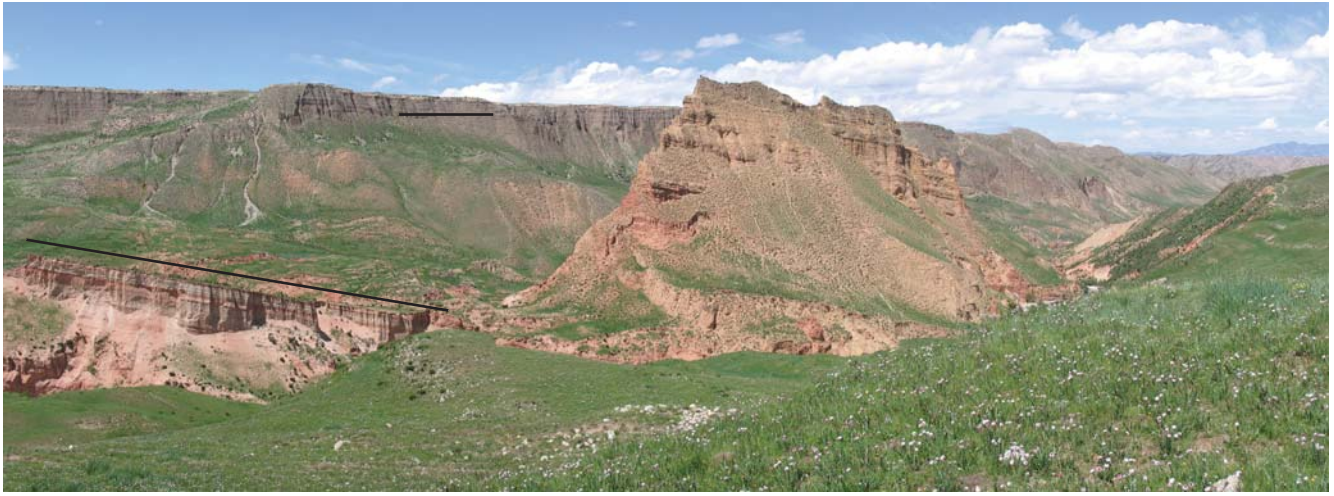

Figure DR3. Angular unconformity between NNE-dipping M2 (approximately  $15^{\circ}$ ) and PQ strata along range that bounds the southwestern margin of Tongde subbasin.  $35^{\circ} 32.814' \text{ N}$ ,  $099^{\circ} 49.505' \text{ E}$ , 3328 m.
