# Supplementary material
Source: publisher figshare collection journal article supplement (https://gsapubs.figshare.com/ndownloader/files/22408851)
Supplement: Supplementary file 2 [file 22408851]

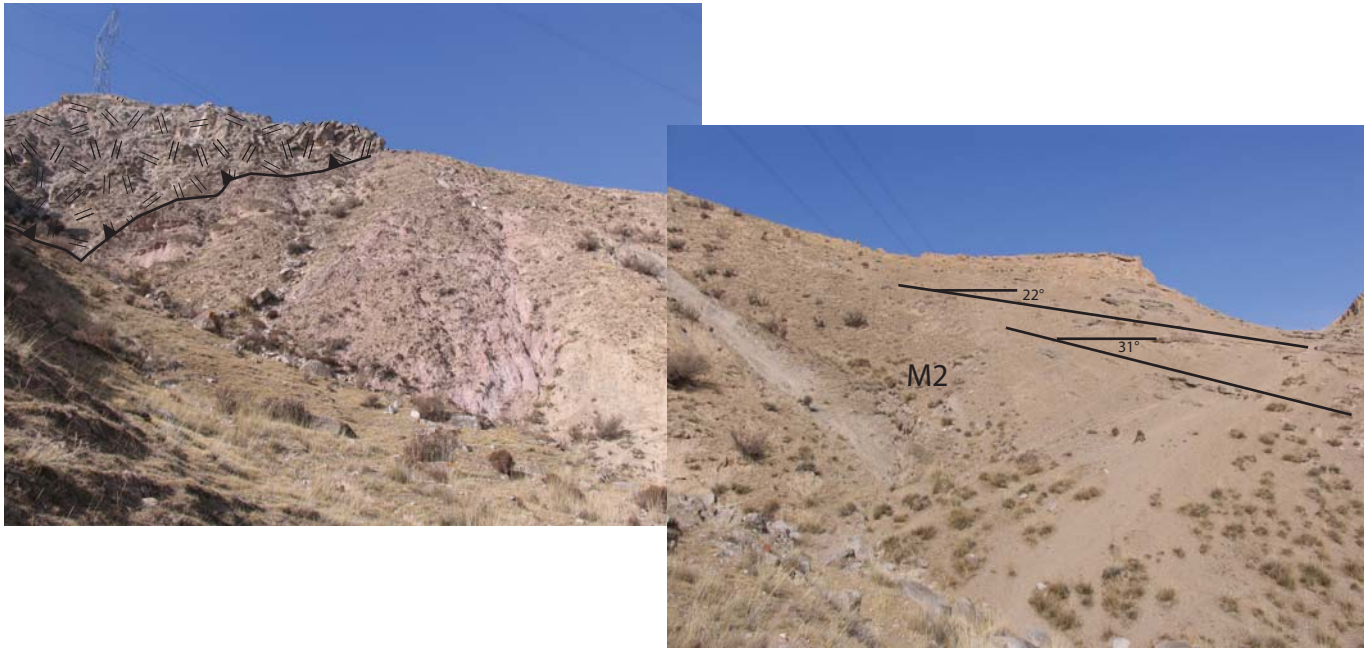

Fig. DR1. Growth strata in M2 along east flank of small, east vergent range to the east of Gonghe city. Granite outcrop in hangingwall of fault is approximately 40 m high.  $36^{\circ} 13' 00.5''$  N,  $100^{\circ} 58' 28.2''$  E, 3145m.
