# Supplementary material
Source: publisher figshare collection journal article supplement (https://gsapubs.figshare.com/ndownloader/files/22408851)

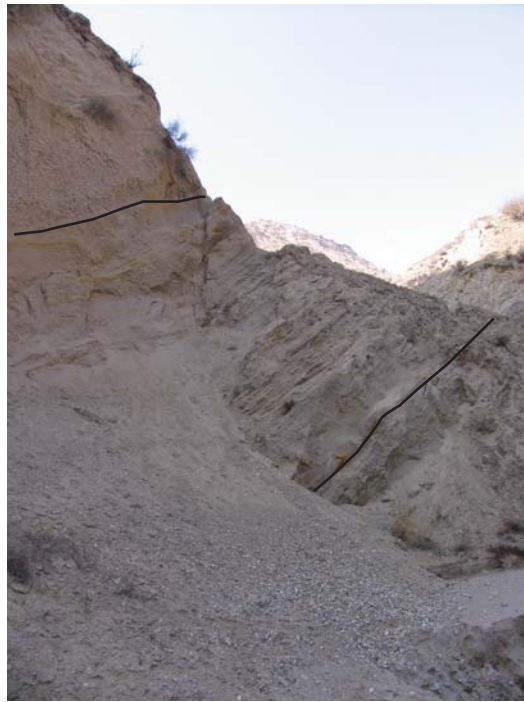

Fig. DR2. Fanning dips in mesoscale outcrop, which is approximately 5-m high.  
36° 12' 56.00" N, 100° 58' 53.3" E, 2933 m.

Supplement: Supplementary file 3 [file 22408851]
